# Supplementary material for: Gas sensors, thermistor and photodetector based on ZnS nanowires
Source: Royal Society of Chemistry journal article supplement (doi:10.1039/c2jm16523f), 2012-01-01
Supplement: c2jm16523f.pdf [file c2jm16523f.pdf]

## SUPPORTING INFORMATION

### **Gas sensors, Thermistor and Photodetector Based on ZnS Nanowires**

**Xianfu Wang, Zhong Xie, Hongtao Huang, Zhe Liu, Di Chen, \*and Guozhen Shen\***

Wuhan National Laboratory for Optoelectronics and College of Optoelectronic  
Science and Engineering, Huazhong University of Science and Technology, Wuhan,  
430074, China

Address correspondence to [gzshen@mail.hust.edu.cn](mailto:gzshen@mail.hust.edu.cn); [dichen@mail.hust.edu.cn](mailto:dichen@mail.hust.edu.cn)

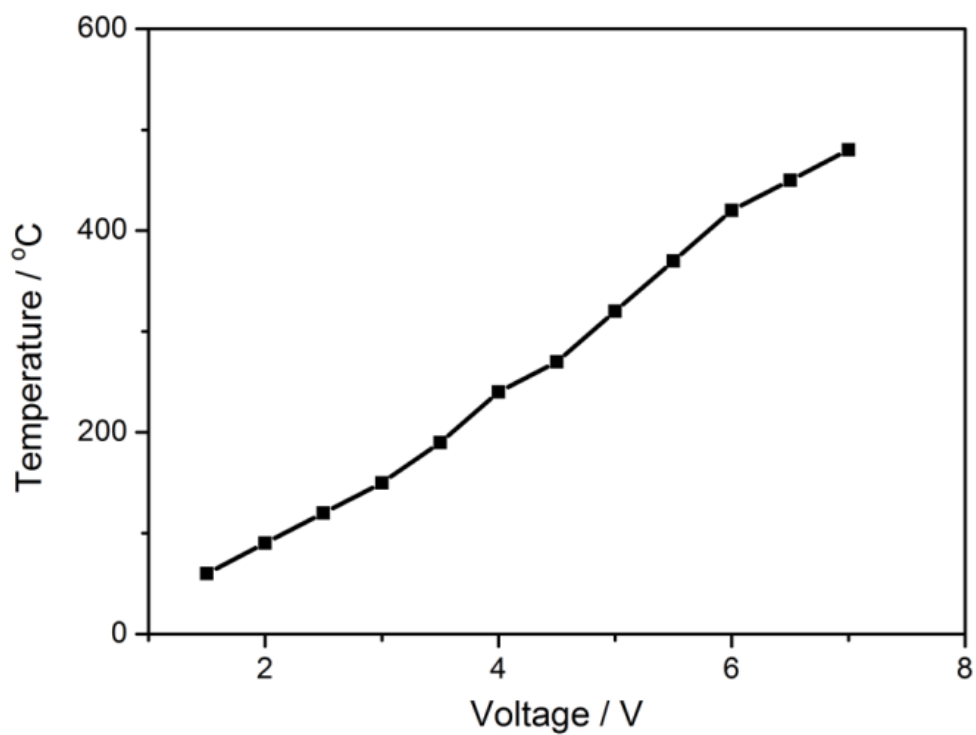

**Figure. S1** The relationship between the alumina ceramic tubes temperature and the applied voltage.

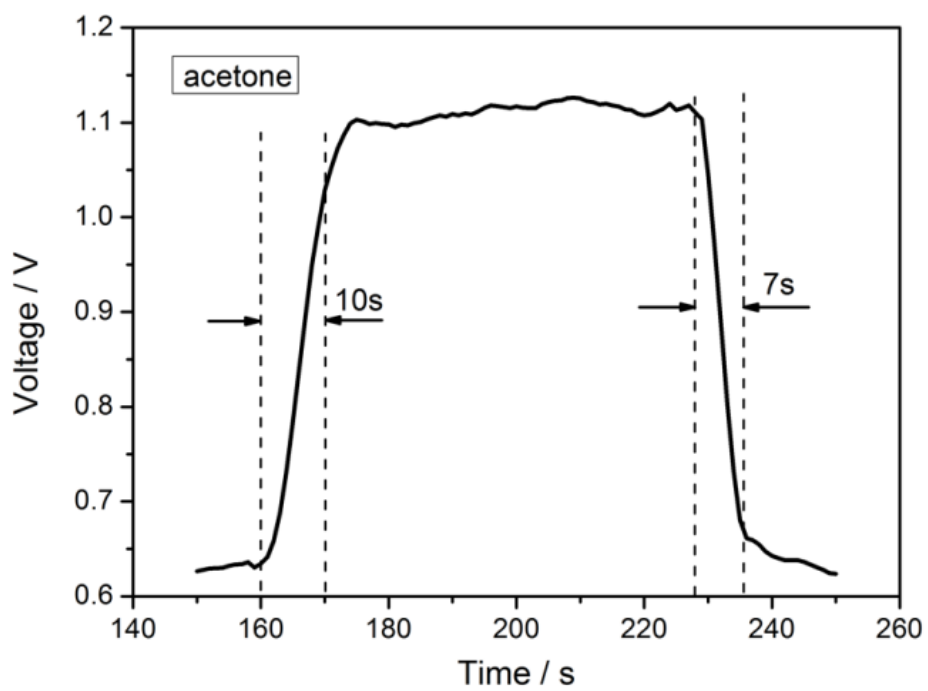

**Figure. S2** The response and recovery times of the ZnS NWs based gas sensor towards 1 ppm acetone.

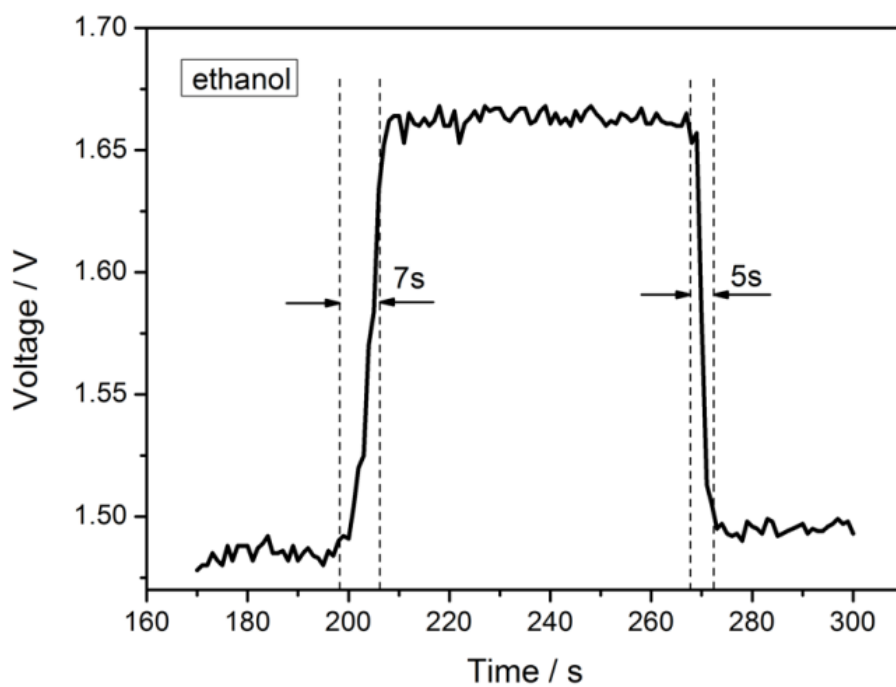

**Figure. S3** The response and recovery times of the ZnS NWs based gas sensor towards 1 ppm ethanol.
